# Supplementary material for: Correlation of the Commercial Anti-SARS-CoV-2 Receptor Binding Domain Antibody Test with the Chemiluminescent Reduction Neutralizing Test and Possible Detection of Antibodies to Emerging Variants
Source: PubMed Central journal article supplement (PMC8635131; doi:10.1128/spectrum.00560-21), 2021-12-01
Supplement: spectrum00560-21_supp_1_seq6.pdf [file spectrum00560-21_supp_1_seq6.pdf]

1 **Supplemental Table 1. Basic statistics of SARS-COV-2 serological tests**

| Profile                  | Confirmed COVID-19 |              |              |              | SARS-CoV-2 PCR negative |              |              |              | Unscreened |
|--------------------------|--------------------|--------------|--------------|--------------|-------------------------|--------------|--------------|--------------|------------|
|                          | symptomatic        |              | asymptomatic |              | symptomatic             |              | asymptomatic |              |            |
|                          | acute              | convalescent | acute        | convalescent | Acute                   | convalescent | acute        | convalescent |            |
| N                        | 42                 | 24           | 6            | 2            | 3                       | 53           | 2            | 121          | 229        |
| CRNT (%)                 |                    |              |              |              |                         |              |              |              |            |
| Minimum                  | 0.0                | 35.5         | 0.0          | 0.0          | 0.0                     | 0.0          | 0.0          | 0.0          | 0.0        |
| 25% Percentile           | 0.0                | 64.1         | 0.0          | 0.0          | 0.0                     | 0.0          | 0.0          | 0.0          | 0.0        |
| Median                   | 0.0                | 83.5         | 34.5         | 34.7         | 0.0                     | 0.0          | 22.5         | 0.0          | 17.0       |
| 75% Percentile           | 30.6               | 90.0         | 75.2         | 69.5         | 0.0                     | 17.5         | 45.0         | 21.2         | 31.2       |
| Maximum                  | 95.5               | 98.5         | 86.5         | 69.5         | 0.0                     | 91.0         | 45.0         | 92.0         | 19.0       |
| htCRNT (%)               |                    |              |              |              |                         |              |              |              |            |
| Minimum                  | 0.0                | 28.0         | 0.0          | 10.0         | 0.0                     | 0.0          | 0.0          | 0.0          | 0.0        |
| 25% Percentile           | 0.0                | 67.2         | 0.0          | 10.0         | 0.0                     | 0.0          | 0.0          | 0.0          | 0.0        |
| Median                   | 0.0                | 83.5         | 45.5         | 25.5         | 0.0                     | 0.0          | 2.0          | 0.0          | 0.0        |
| 75% Percentile           | 15.0               | 91.0         | 86.0         | 31.0         | 0.0                     | 0.0          | 4.0          | 0.0          | 11.0       |
| Maximum                  | 98.0               | 98.0         | 89.0         | 31.0         | 0.0                     | 83.0         | 4.0          | 91.0         | 50.0       |
| Anti-RBD antibody (U/mL) |                    |              |              |              |                         |              |              |              |            |
| Minimum                  | 0.40               | 0.84         | 0.40         | 0.40         | 0.40                    | 0.40         | 0.40         | 0.40         | 0.40       |
| 25% Percentile           | 0.40               | 7.63         | 0.40         | 0.40         | 0.40                    | 0.40         | 0.40         | 0.40         | 0.40       |
| Median                   | 0.40               | 35.0         | 1.59         | 16.4         | 0.40                    | 0.40         | 0.40         | 0.40         | 0.40       |
| 75% Percentile           | 0.46               | 137.0        | 7.55         | 32.4         | 0.40                    | 0.40         | 0.40         | 0.40         | 0.40       |
| Maximum                  | 25.1               | 1640         | 12.3         | 32.4         | 0.40                    | 66.4         | 0.40         | 294.0        | 0.40       |

2 CRNT, chemiluminescent reduction neutralizing test; htCRNT, high-throughput CRNT, RBD, receptor-binding domain

3

4 **Supplemental Table 2. Samples with discordant serological test results**

5

| Profile                    | CRNT                     |          | htCRNT                   |          | Anti-RBD antibody |          |
|----------------------------|--------------------------|----------|--------------------------|----------|-------------------|----------|
|                            | Values<br>(% Inhibition) | Results  | Values<br>(% Inhibition) | Results  | Values<br>(U/mL)  | Results  |
| Confirmed COVID-19         |                          |          |                          |          |                   |          |
| symptomatic, convalescent  | 35.5                     | Negative | 28.0                     | Negative | 5.06              | Positive |
| asymptomatic, convalescent | 69.5                     | Positive | 41.0                     | Negative | 32.4              | Positive |
| SARS-CoV-2 PCR negative    |                          |          |                          |          |                   |          |
| symptomatic, convalescent  | 53.5                     | Positive | 0.0                      | Negative | 0.40              | Negative |
| asymptomatic, convalescent | 85.0                     | Positive | 37.0                     | Negative | 2.05              | Positive |
| asymptomatic, convalescent | 58.5                     | Positive | 22.0                     | Negative | 0.40              | Negative |
| Unscreened                 |                          |          |                          |          |                   |          |
|                            | 69.0                     | Positive | 22.0                     | Negative | 0.40              | Negative |
|                            | 66.0                     | Positive | 37.0                     | Negative | 0.40              | Negative |

6 CRNT, chemiluminescent reduction neutralizing test; htCRNT, high-throughput CRNT; RBD, receptor-binding domain

7

8 **Supplemental Table 3. Testing in acute and convalescent phases**

9

| Test                   | Result   | Phase     |                  | Fisher's exact test |
|------------------------|----------|-----------|------------------|---------------------|
|                        |          | Acute (n) | Convalescent (n) |                     |
| CRNT                   | Positive | 13        | 21               | p < 0.01            |
|                        | Negative | 38        | 2                |                     |
| htCRNT                 | Positive | 13        | 20               | p < 0.01            |
|                        | Negative | 38        | 3                |                     |
| Anti-RBD antibody test | Positive | 13        | 22               | p < 0.01            |
|                        | Negative | 38        | 1                |                     |

10 CRNT; chemiluminescent reduction neutralizing test, htCRNT; high-throughput CRNT, RBD; receptor binding domain

11

12 **Supplemental Table 4. Test results and clinical symptoms of confirmed COVID-19 patients with positive serological tests**  
 13 **in the acute phase**

14

| Days after onset<br>or the episode of<br>close contact | Age range<br>(years) | CRNT            |          | htCRNT          |          | Anti-RBD antibody<br>test |          | Symptoms                                              |
|--------------------------------------------------------|----------------------|-----------------|----------|-----------------|----------|---------------------------|----------|-------------------------------------------------------|
|                                                        |                      | %<br>Inhibition | Results  | %<br>Inhibition | Results  | U/mL                      | Results  |                                                       |
| 2                                                      | 40-49                | 60.0            | Positive | 81.0            | Positive | 3.26                      | Positive | Fever                                                 |
| 4                                                      | ≥70                  | 72.5            | Positive | 73.0            | Positive | 13.1                      | Positive | Fever, dyspnea                                        |
| 6                                                      | ≥70                  | 76.0            | Positive | 63.0            | Positive | 1.07                      | Positive | Fever, cough                                          |
| 7                                                      | 60-69                | 80.5            | Positive | 77.0            | Positive | 3.40                      | Positive | Fever                                                 |
| 8                                                      | 60-69                | 95.5            | Positive | 91.0            | Positive | 1.72                      | Positive | Fever, cough, sputum,<br>loss of taste, loss of smell |
| 9                                                      | 50-59                | 89.5            | Positive | 98.0            | Positive | 25.1                      | Positive | Fever, cough                                          |
| 9                                                      | ≥70                  | 88.5            | Positive | 78.0            | Positive | 1.09                      | Positive | Fever                                                 |
| 2                                                      | ≤19                  | 65.5            | Positive | 79.0            | Positive | 2.77                      | Positive | No symptom*                                           |
| 3                                                      | ≥70                  | 86.5            | Positive | 89.0            | Positive | 5.97                      | Positive | No symptom*                                           |
| 5                                                      | ≤19                  | 71.5            | Positive | 85.0            | Positive | 12.3                      | Positive | No symptom*                                           |

15 \* No symptoms but consecutive positives in follow-up SARS-CoV-2 PCR tests. Discharged after confirming a PCR-negative result.

16 CRNT; chemiluminescent reduction neutralizing test, htCRNT; high-throughput CRNT, RBD; receptor binding domain

17

18 **Supplemental Figure 1**

19 **(A)** CRNT using 100-fold and 400-fold dilutions of sera from patients convalescing following  
20 symptomatic COVID-19. **(B)** Anti-RBD antibody test using 100-fold and 400-fold dilutions of  
21 sera from patients convalescing following symptomatic COVID-19. Bars indicate medians.

22

### Supplemental Fig. 1

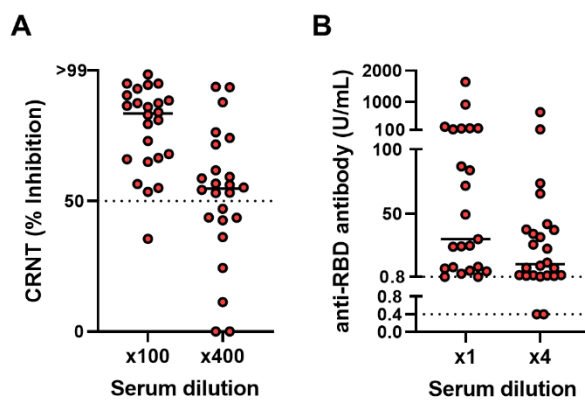

23

24 **Supplemental Figure 2**

25 Relationship between seroconversion and RNAemia in confirmed COVID-19 patients in the  
26 acute phase. The Kaplan-Meier analysis was performed only for patients who had RNAemia.  
27 ns, not significant.

28

**Supplemental Fig. 2**

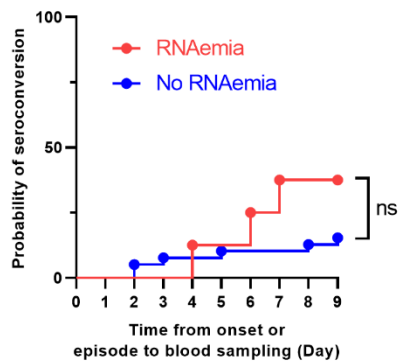

29

30 **Supplemental Figure 3**

31 **(A)** Correlation between htCRNT and CRNT. Neutralization was assessed using serum  
32 samples diluted 1:100. Correlation was expressed using Pearson's correlation coefficients.

33 **(B)** Neutralization of pseudotyped viruses measured using htCRNT. **(C)** ROC curve of  
34 htCRNT for classification of symptomatic confirmed COVID-19 patients in the convalescent  
35 phase and unscreened individuals. **(D)** Comparison of htCRNT neutralization levels and anti-  
36 RBD antibody results. Concordant samples are red (positive for both tests) or white (negative  
37 for both tests). Discordant samples are green (positive for anti-RBD antibodies). The dotted  
38 line for htCRNT indicates 50% inhibition ( $IC_{50}$ ). **(E)** Relationship between htCRNT results and

39 time from symptom onset or a close-contact episode to blood sampling in patients with  
40 COVID-19. Symptomatic and asymptomatic individuals are presented in red and blue (blue  
41 arrowhead for overlapped), respectively. Error bars indicate medians (middle lines) and  
42 interquartile range. \*\*\* $p < 0.001$  by unpaired Kruskal-Wallis test and Dunn's multiple  
43 comparison (unscreened group as a control). Ac, acute phase; Co, convalescent phase; S,  
44 symptomatic; AS, asymptomatic; Unscr., unscreened; PCR negative, SARS-CoV-2 PCR-  
45 negative; AUC, area under the curve; COV, cut-off value; Sn, sensitivity; Sp, specificity.

46

# Supplemental Fig. 3

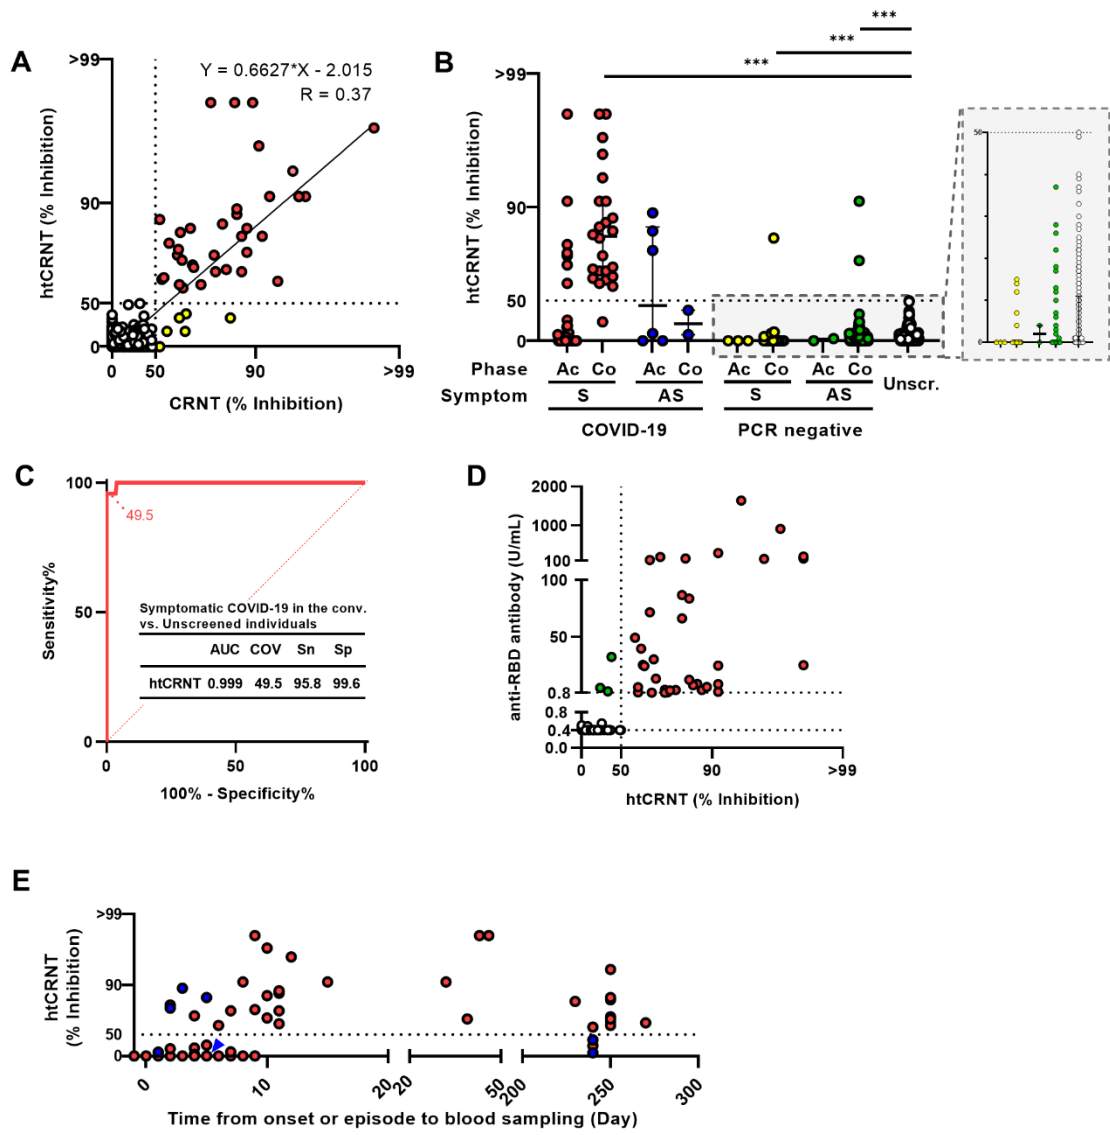



48 **Supplemental Figure 4**

49 Relationships between **(A)** ELISA and **(B)** CRNT values from sera that neutralize WT  
50 pseudotyped virus. The results from neutralization of WT (left), B.1.1.7 variant (middle), and  
51 B1.351 variant (right) were plotted for each. Dotted lines represent linear regression.  
52 Correlations were measured using Pearson's correlation coefficients.

53

**Supplemental Fig. 4**

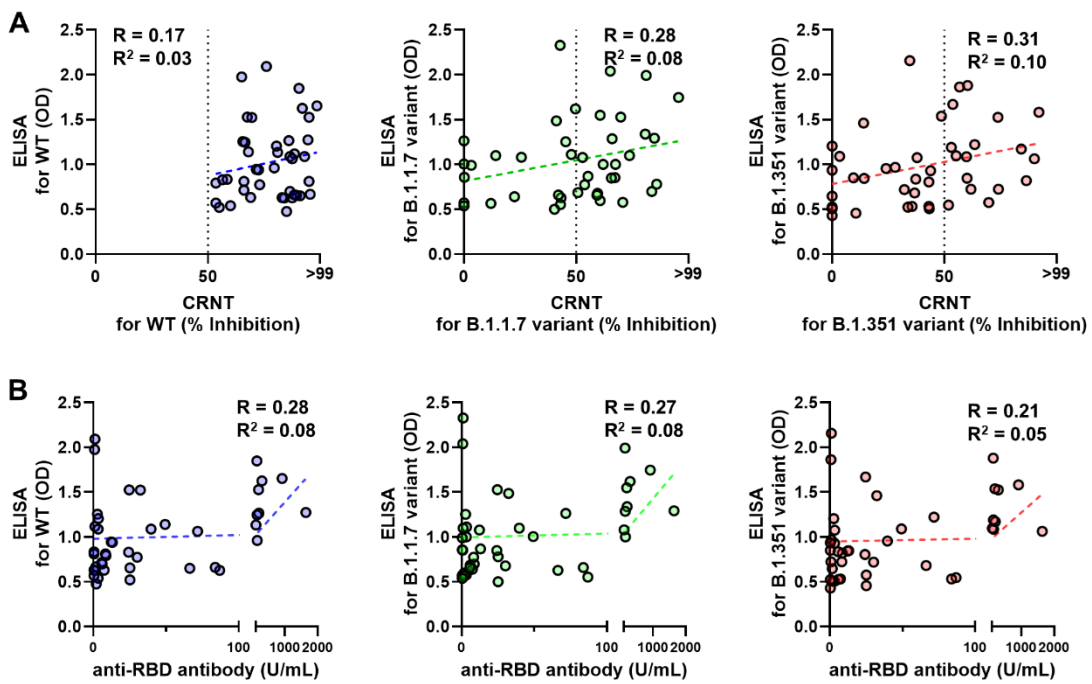

54
